# Supplementary material for: Perturbating Intramolecular Hydrogen Bonds through Substituent Effects or Non-Covalent Interactions
Source: MDPI journal article supplement (doi:10.3390/molecules26123556), 2021-06-10
Supplement: s1 [file s1]

# SUPPORTING INFORMATION

\*\*\*

## **Perturbating Intramolecular hydrogen bonds through substituent effects or non-covalent interactions.**

Al Mokhtar Lamsabhi, Otilia Mó and Manuel Yáñez

Departamento de Química (Módulo 13, Facultad de Ciencias) and Institute of Advanced Chemical Sciences (IadChem). Universidad Autónoma de Madrid. Campus de Excelencia UAM-CSIC. Cantoblanco, 28049-Madrid, Spain

E-mail: [mokhtar.lamsabhi@uam.es](mailto:mokhtar.lamsabhi@uam.es), [manuel.yanez@uam.es](mailto:manuel.yanez@uam.es)

## CONTENTS

**Figure S1.** Relative stability of the  $\text{HOCH}_2(\text{CH}_2)_n\text{CH}_2\text{NH}_2$  ( $n = 0-2$ ) aminoalcohols stabilized by the formation of an  $\text{O-H}\cdots\text{N}$  IMHB or a  $\text{N-H}\cdots\text{O}$  IMHB.

**Figure S2.** Molecular structures of the substituted  $\text{HOCHX}(\text{CH}_2)_n\text{CH}_2\text{NH}_2$  ( $n = 0-5$ ,  $\text{X} = \text{H, F, Cl, Br}$ ) aminoalcohols.

**Figure S3.** Molecular structures of the substituted  $\text{HOCH}_2(\text{CH}_2)_n\text{CHXNH}_2$  ( $n = 0-5$ ,  $\text{X} = \text{F, Cl, Br}$ ) aminoalcohols.

**Table S1.** Second-order orbital interactions energies between the nitrogen lone-pair and the  $\sigma^*_{\text{OH}}$  antibonding orbital for the  $\text{HOCH}_2(\text{CH}_2)_n\text{CH}_2\text{NH}_2$  ( $n = 0-3$ ) amino-alcohols and their  $\text{O}\cdots\text{BeF}_2$  complexes

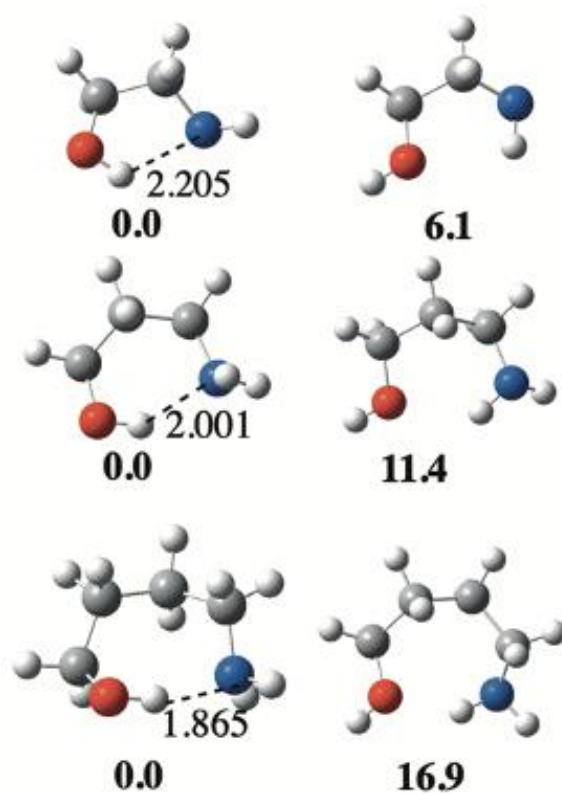

**Figure S1.** Relative stability of the  $\text{HOCH}_2(\text{CH}_2)_n\text{CH}_2\text{NH}_2$  ( $n = 0-2$ ) aminoalcohols stabilized by the formation of an  $\text{O-H}\cdots\text{N}$  IMHB or a  $\text{N-H}\cdots\text{O}$  IMHB.

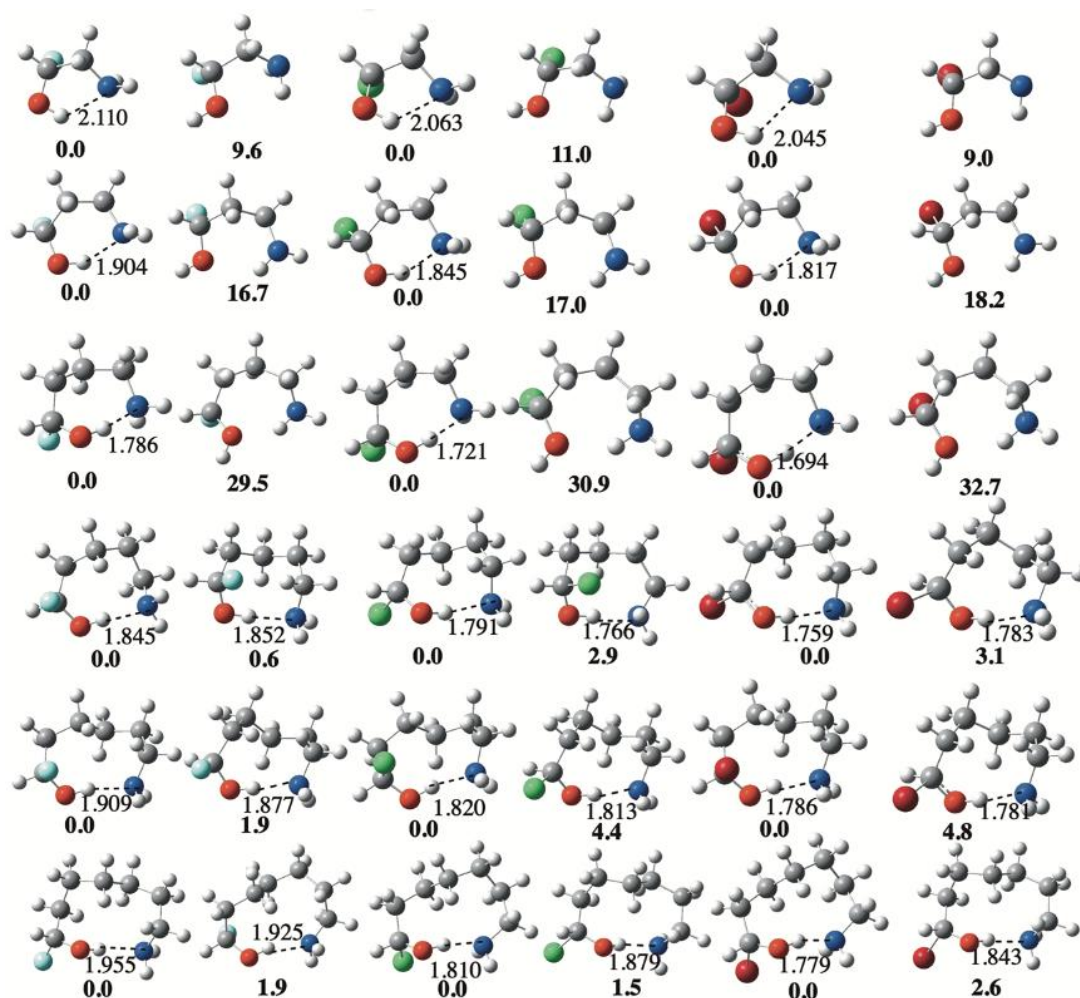

**Figure S2.** Molecular structures of the substituted  $\text{HOCHX}(\text{CH}_2)_n\text{CH}_2\text{NH}_2$  ( $n = 0-5$ ,  $\text{X} = \text{H, F, Cl, Br}$ ) aminoalcohols, showing the bond-length, in Å, of the  $\text{O-H}\cdots\text{N}$  (or  $\text{NH}\cdots\text{O}$ ) intramolecular hydrogen bonds. The relative energies ( $\text{kJ}\cdot\text{mol}^{-1}$ ) with respect to the global minimum in each case is also given.

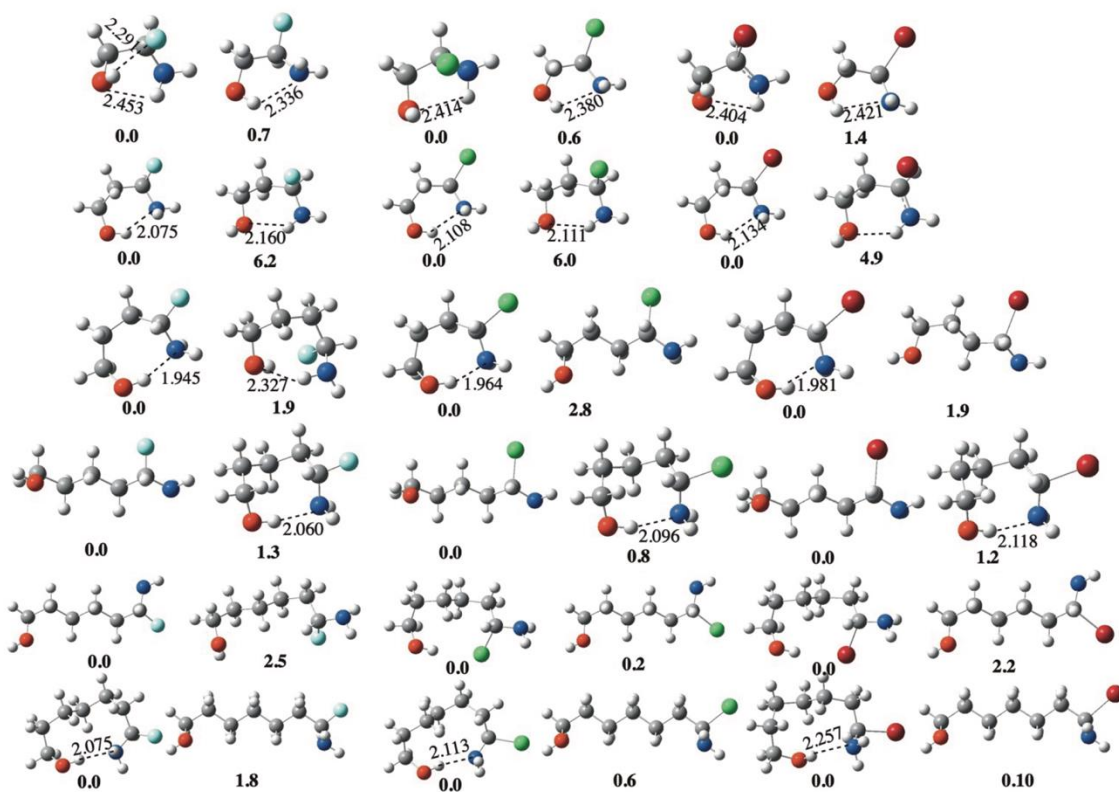

**Figure S3.** Molecular structures of the substituted  $\text{HOCH}_2(\text{CH}_2)_n\text{CHXNH}_2$  ( $n = 0-5$ ,  $X = \text{F}, \text{Cl}, \text{Br}$ ) aminoalcohols, showing the bond-length, in Å, of the  $\text{O}-\text{H}\cdots\text{N}$  (or  $\text{NH}\cdots\text{O}$ ) intramolecular hydrogen bonds. The relative energies ( $\text{kJ}\cdot\text{mol}^{-1}$ ) with respect to the global minimum in each case is also given.

**Table S1.** Second-order orbital interactions energies ( $\text{kJ}\cdot\text{mol}^{-1}$ ) between the nitrogen lone-pair and the  $\sigma_{\text{OH}}^*$  antibonding orbital for the  $\text{HOCH}_2(\text{CH}_2)_n\text{CH}_2\text{NH}_2$  ( $n = 0-3$ ) amino-alcohols and their  $\text{O}\cdots\text{BeF}_2$  complexes.

| n | Isolated amino-alcohol | Complex with BeF <sub>2</sub> |
|---|------------------------|-------------------------------|
| 0 | 6.8                    | 24.8                          |
| 1 | 32.3                   | 112.1                         |
| 2 | 67.6                   | 215.0                         |
| 3 | 49.2                   | 203.9                         |
